# Supplementary material for: Structure of AadA from Salmonella enterica: a monomeric aminoglycoside (3′′)(9) adenyltransferase
Source: PubMed Central journal article supplement (PMC4631478; doi:10.1107/s1399004715016429), 2015-10-31
Supplement: d-71-02267-sup1.pdf [file d-71-02267-sup1.pdf]

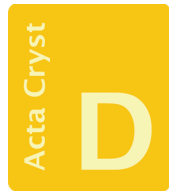

BIOLOGICAL  
CRYSTALLOGRAPHY

**Volume 71 (2015)**

**Supporting information for article:**

**Structure of AadA from *Salmonella enterica*: a monomeric aminoglycoside (3'')(9) adenytransferase**

**Yang Chen, Joakim Näsval, Shiyng Wu, Dan I. Andersson and Maria Selmer**

**Table S1** Bacterial strains and plasmids. All strains are derivatives of *Salmonella enterica* serovar *Typhimurium* strain LT2.

| Strain               | Genotype                                                | Source/Reference |
|----------------------|---------------------------------------------------------|------------------|
| DA6192               | Wild type                                               | Lab collection   |
| DA18900              | aadA::cat                                               | (3)              |
| DA27238              | Wild type / pSIM5-Tet                                   | Lab collection   |
| DA28773              | galE::cat-sacB-T0 (template for amplifying cat-sacB-T0) | Lab collection   |
| DA29570              | aadA87::cat-sacB-T0 / pSIM5-Tet                         | This study       |
| DA29572              | aadA112::cat-sacB-T0 / pSIM5-Tet                        | This study       |
| DA29574              | aadA182::cat-sacB-T0 / pSIM5-Tet                        | This study       |
| DA29576              | aadA192::cat-sacB-T0 / pSIM5-Tet                        | This study       |
| DA29578              | aadA205::cat-sacB-T0 / pSIM5-Tet                        | This study       |
| DA29580              | aadA(E87A)                                              | This study       |
| DA29582              | aadA(E87Q)                                              | This study       |
| DA29584              | aadA(W112A)                                             | This study       |
| DA29586              | aadA(W112F)                                             | This study       |
| DA29588              | aadA(D182A)                                             | This study       |
| DA29590              | aadA(D182N)                                             | This study       |
| DA29592              | aadA(R192A)                                             | This study       |
| DA29594              | aadA(K205A)                                             | This study       |
| DA30831              | aadA[E87A] / pSIM5-Tet                                  | This study       |
| DA30833              | aadA[E87Q] / pSIM5-Tet                                  | This study       |
| DA30835              | aadA[W112A] / pSIM5-Tet                                 | This study       |
| DA30837              | aadA[W112F] / pSIM5-Tet                                 | This study       |
| DA30839              | aadA[D182A] / pSIM5-Tet                                 | This study       |
| DA30841              | aadA[D182N] / pSIM5-Tet                                 | This study       |
| DA30843              | aadA[R192A] / pSIM5-Tet                                 | This study       |
| DA30845              | aadA[K205A] / pSIM5-Tet                                 | This study       |
| Plasmid              | Description                                             | Source/Reference |
| pSIM5-Tet            | Temperature inducible $\lambda$ -red system             | (3)              |
| pEXP5-CT-aadA        |                                                         | This study       |
| pEXP5-CT-aadA[E87A]  |                                                         | This study       |
| pEXP5-CT-aadA[E87Q]  |                                                         | This study       |
| pEXP5-CT-aadA[W112A] |                                                         | This study       |
| pEXP5-CT-aadA[W112F] |                                                         | This study       |
| pEXP5-CT-aadA[D182A] |                                                         | This study       |
| pEXP5-CT-aadA[D182N] |                                                         | This study       |
| pEXP5-CT-aadA[R192A] |                                                         | This study       |
| pEXP5-CT-aadA[K205A] |                                                         | This study       |

**Table S2** Oligonucleotides used in this study.

| Primers for cloning and sequencing aadA in pEXP5-CT:                                                                                      |                                                                                 |
|-------------------------------------------------------------------------------------------------------------------------------------------|---------------------------------------------------------------------------------|
| aadA_start_F                                                                                                                              | ATGACGCTGTCCATACCGCC                                                            |
| wd                                                                                                                                        |                                                                                 |
| aadA_CT_R                                                                                                                                 | TGTGAACTGCGTGGGGATGT                                                            |
| ev                                                                                                                                        |                                                                                 |
| T7_Forward                                                                                                                                | TAATACGACTCACTATAGGG                                                            |
| T7_Term_Re                                                                                                                                | ATCCGGATATAGTTCCTCCTTTC                                                         |
| verse                                                                                                                                     |                                                                                 |
| Primers for PCR amplification of the cat-sacB-T0 cassette with 40 bp flanking homologies to the five target codons in aadA <sup>a</sup> : |                                                                                 |
| aadA87-P1                                                                                                                                 | <u>TTCATCGCCGCCGGGGCGTTCGGCAGAAAAACGCGCTCTGTGTAGGCTGGAGCTGCTTC</u>              |
| aadA87-P2                                                                                                                                 | <u>AACACCAGGGAACCAGCTGCGAATAAAGCACGACAGTGACATATGAATATCCTCCTTAGTTCC</u>          |
| aadA112-P1                                                                                                                                | <u>CTGGTGTTCACCTTCCAGGGAAATGCAATTTGGCGAGTGTAGGCTGGAGCTGCTTC</u>                 |
| aadA112-P2                                                                                                                                | <u>CGCTGGTTCATAAATCCCCTGACAAATGTCCTCTCTTAGCATATGAATATCCTCCTTAGTTCC</u>          |
| aadA182-P1                                                                                                                                | <u>CCCCTCGACCTTTGGCAATCCACGGCAGATGTGCAGGGAGTGTAGGCTGGAGCTGCTTC</u>              |
| aadA182-P2                                                                                                                                | <u>TACCAGATACGCGCCAGGGTTAAAACGATATGATACTCATATGAATATCCTCCTTAGTTCC</u>            |
| aadA192-P1                                                                                                                                | <u>TGTGCAGGGAGATGAGTATCATATCGTTTTAACCTGGCGTGTAGGCTGGAGCTGCTTC</u>               |
| aadA192-P2                                                                                                                                | <u>TTAGAGGTAATCTCCCGGTAGAAAGGGTATACCAGATACATATGAATATCCTCCTTAGTTCC</u>           |
| aadA205-P1                                                                                                                                | <u>GCGTATCTGGTATACCCTTTCTACCGGGAGATTTACCTCTGTGTAGGCTGGAGCTGCTTC</u>             |
| aadA205-P2                                                                                                                                | <u>CTTCTGGCAACTGAGGTAACAGCCAGTCAGCCGCCGCATCATATGAATATCCTCCTTAGTTCC</u>          |
| Oligos for replacing the cat-sacB-T0 cassettes and introducing point mutations <sup>b</sup> :                                             |                                                                                 |
| aadA_E87Q                                                                                                                                 | CCAGGGAACCAGCTGCGAATAAAGCACGACAGTGACCTGCAGAGCGCGTTTTTC<br>TGCCGACGCCCCGGCGGCGA  |
| aadA_E87A                                                                                                                                 | CCAGGGAACCAGCTGCGAATAAAGCACGACAGTGACCGCCAGAGCGCGTTTTTC<br>TGCCGACGCCCCGGCGGCGA  |
| aadA_W112<br>F                                                                                                                            | TGGTTCATAAATCCCCTGACAAATGTCCTCTCTTAGGAACTCGCCAAATTGCATT<br>TCCCTGGAAGGTGGAAAACA |
| aadA_W112<br>A                                                                                                                            | TGGTTCATAAATCCCCTGACAAATGTCCTCTCTTAGCGCCTCGCCAAATTGCATT<br>TCCCTGGAAGGTGGAAAACA |

|           |                                                                           |
|-----------|---------------------------------------------------------------------------|
| aadA_D182 | CCAGATACGCGCCAGGGT <b>T</b> AAAACGATATGATACTCATTTC <b>C</b> CCTGCACATCTGC |
| N         | CGTGGATTGCCAAAGGTCGAG                                                     |
| aadA_D182 | CCAGATACGCGCCAGGGT <b>T</b> AAAACGATATGATACTCAGCTCCCTGCACATCTGC           |
| A         | CGTGGATTGCCAAAGGTCGAG                                                     |
| aadA_R192 | AGAGGTAAATCTCCCGGTAGAAAGGGTATACCAGATAGCCGCCAGGGT <b>T</b> AAAA            |
| A         | CGATATGATACTCATCTCCCTG                                                    |
| aadA_K205 | TGGCAACTGAGGTAACAGCCAGTCAGCCGCCGCATCCGCAGAGGTAAATCTCC                     |
| A         | CGGTAGAAAGGGTATACCAGAT                                                    |

---

Primers for PCR and sequencing of the chromosomal aadA locus:

|          |                      |
|----------|----------------------|
| aadAverF | GCCGTTATGCCATATTTCTG |
| aadAverR | ACTTCAGCGATGAGAACCTA |

---

Primers for gap-repair cloning of mutant aadA alleles:

|            |                       |
|------------|-----------------------|
| aadA_grc-r | GCGACAGCGGAACCATATAAA |
| aadA_grc-f | ATATTTTGCTGCCTGCGGTC  |

---

<sup>a</sup>The 20 or 24 nt in bold font indicate the 3' priming end, complementary to the template. The 40 underlined nt indicate the 5'-extensions used as homology for  $\lambda$ -red recombineering.

<sup>b</sup>The oligos are designed to invade during lagging strand synthesis, and are complementary to the coding strand

of aadA. The sequences complementary to the target codons are indicated with bold font.

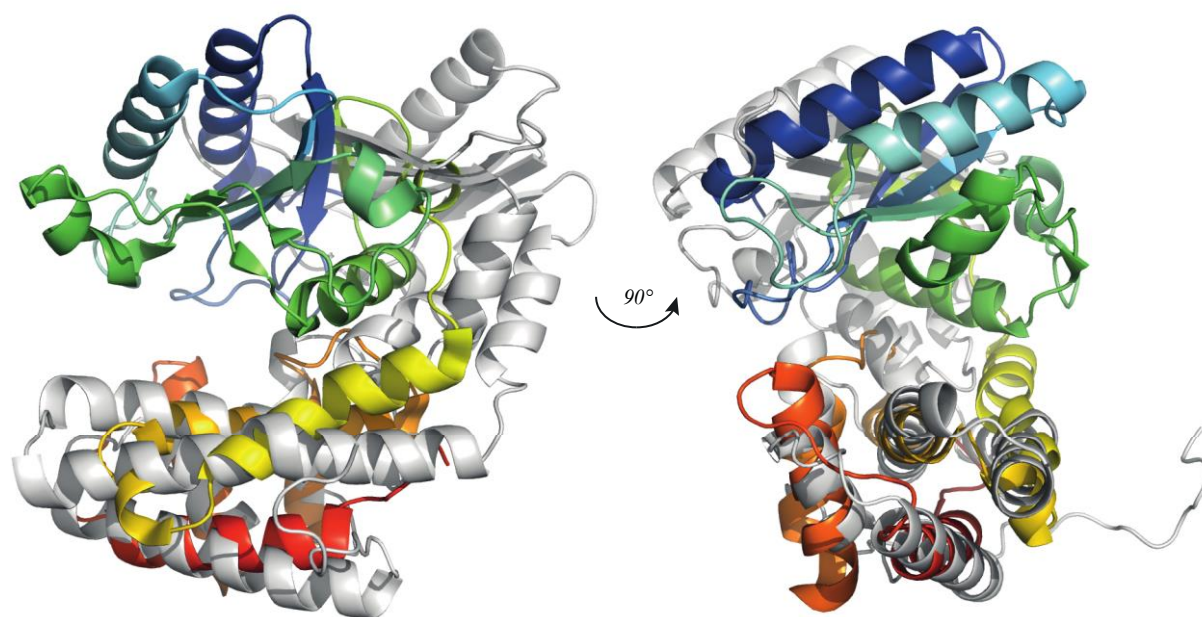

**Figure S1** Superposition of Aada (rainbow colors) and KNTase (grey, pdb 1kny (Pedersen *et al.*, 1995)) based on the N-terminal domain.

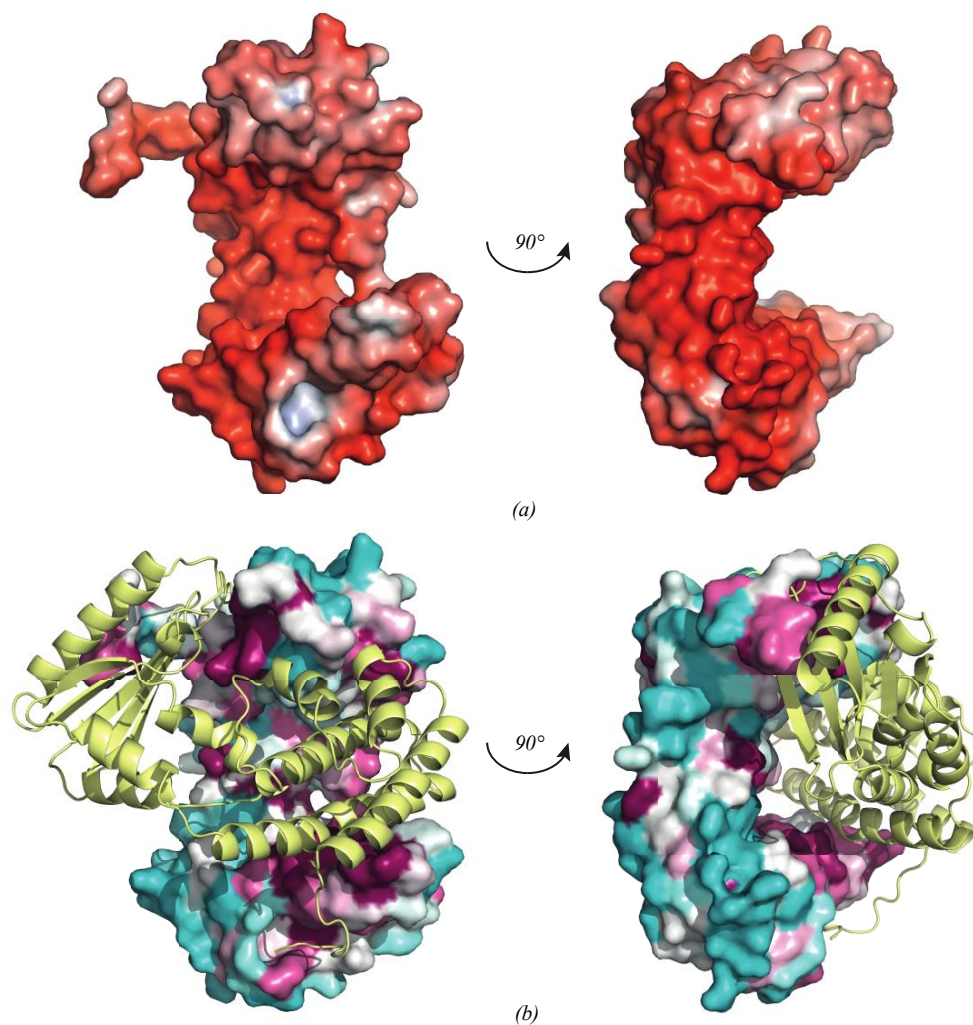

**Figure S2** Surface properties of KNTase (pdb 1kny (Pedersen *et al.*, 1995)). (a) Electrostatic surface potential. The color spectrum ranges from deep red (-7 kT) to deep blue (+7 kT). (b) Surface conservation mapped by ConSurf (Ashkenazy *et al.*, 2010, Celniker *et al.*, 2013). The color spectrum ranges from magenta (highest conservation) to cyan (lowest conservation). The second subunit of KNTase is shown as cartoon in light yellow.

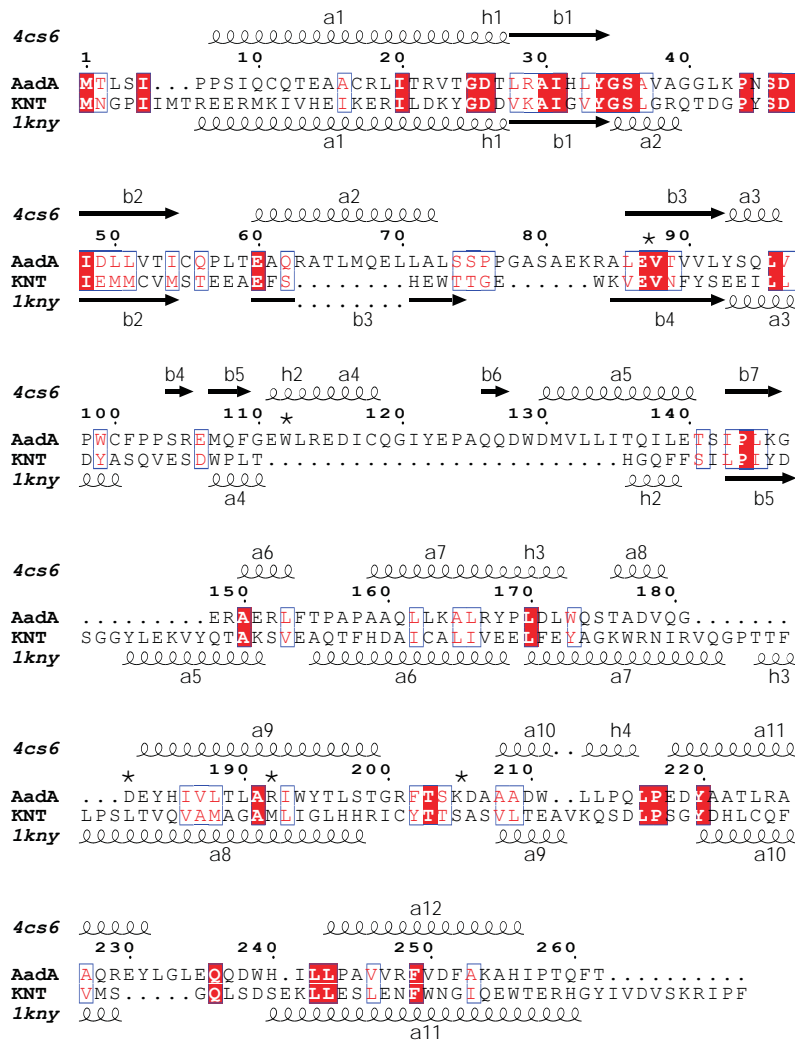

**Figure S3** Structure-based sequence alignment of AadA and KNTase (pdb, 1kny (Pedersen *et al.*, 1995)). Strictly conserved residues are highlighted in red and conservative substitutions are in red font. Secondary structure is shown for AadA above the sequences and for KNTase below the sequences. Residues subjected to mutagenesis are indicated with asterisks above the alignment.

**Supplementary references**

Ashkenazy, H., Erez, E., Martz, E., Pupko, T. & Ben-Tal, N. (2010). *Nucleic Acids Res.* **38**, W529-533.

Celniker, G., Nimrod, G., Ashkenazy, H., Glaser, F., Martz, E., Mayrose, I., Pupko, T. & Ben-Tal, N. (2013). *Isr J Chem* **53**, 199-206.

Pedersen, L. C., Benning, M. M. & Holden, H. M. (1995). *Biochemistry (Mosc)*. **34**, 13305-13311.
